# Supplementary material for: Lysosomal protease cathepsin D; a new driver of apoptosis during acute kidney injury
Source: PubMed Central journal article supplement (PMC4895243; doi:10.1038/srep27112), 2016-06-07
Supplement: srep27112-s1.pdf [file srep27112-s1.pdf]

# **Lysosomal protease cathepsin D; a new driver of apoptosis during acute kidney injury**

Pasquale Cocchiaro<sup>1,2#</sup>, Christopher Fox<sup>1#</sup>, Nicholas W Tregidgo<sup>1</sup>, Rachel Howarth<sup>1</sup>, Katrina M Wood<sup>3</sup>, Gerhard R Situmorang<sup>1,4</sup>, Luigi M Pavone<sup>2</sup>, Neil S Sheerin<sup>1</sup>, Anna Moles<sup>1\*</sup>

<sup>1</sup> Fibrosis Research Group, Institute of Cellular Medicine, Newcastle University, Newcastle Upon Tyne, UK

<sup>2</sup> Department of Molecular Medicine and Medical Biotechnology, University of Naples Federico II, Italy

<sup>3</sup> Department of Cellular Pathology, Royal Victoria Infirmary, Newcastle Upon Tyne, UK

<sup>4</sup> Urology Department, RSCM/Faculty of Medicine, University of Indonesia

#Both authors contributed equally

\*Corresponding author

Address correspondence to: Anna Moles, Fibrosis Research Group, Institute of Cellular Medicine, Newcastle University. 4th Floor William Leech Building, Medical School, Framlington Place, Newcastle Upon Tyne, NE2 4HH, United Kingdom.

Phone: +44 (0)191 208 3886; E-mail: ana.moles@ncl.ac.uk.

**Supplementary Figure S1: Differential expression of CtsD in proximal and distal tubular epithelial cells in vehicle and FA injured kidneys**

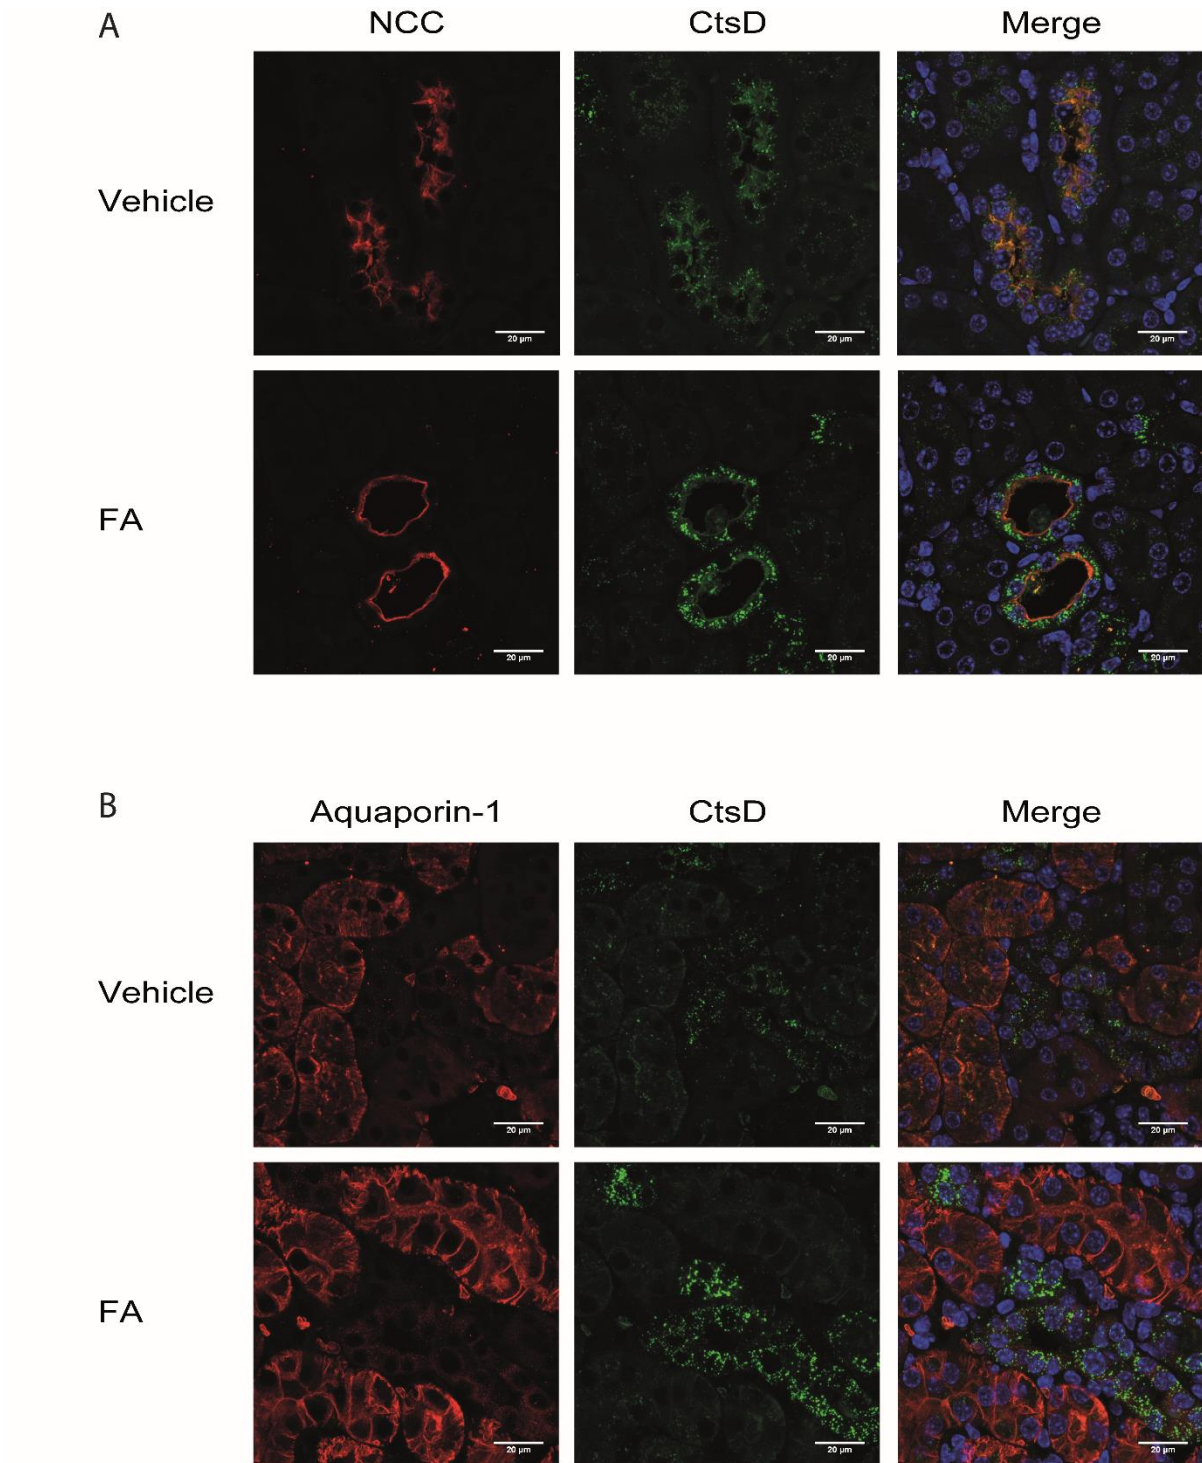

## Supplementary Figure S2: Pepstatin A does not affect inflammatory mediators

### during nephrotoxic induce AKI

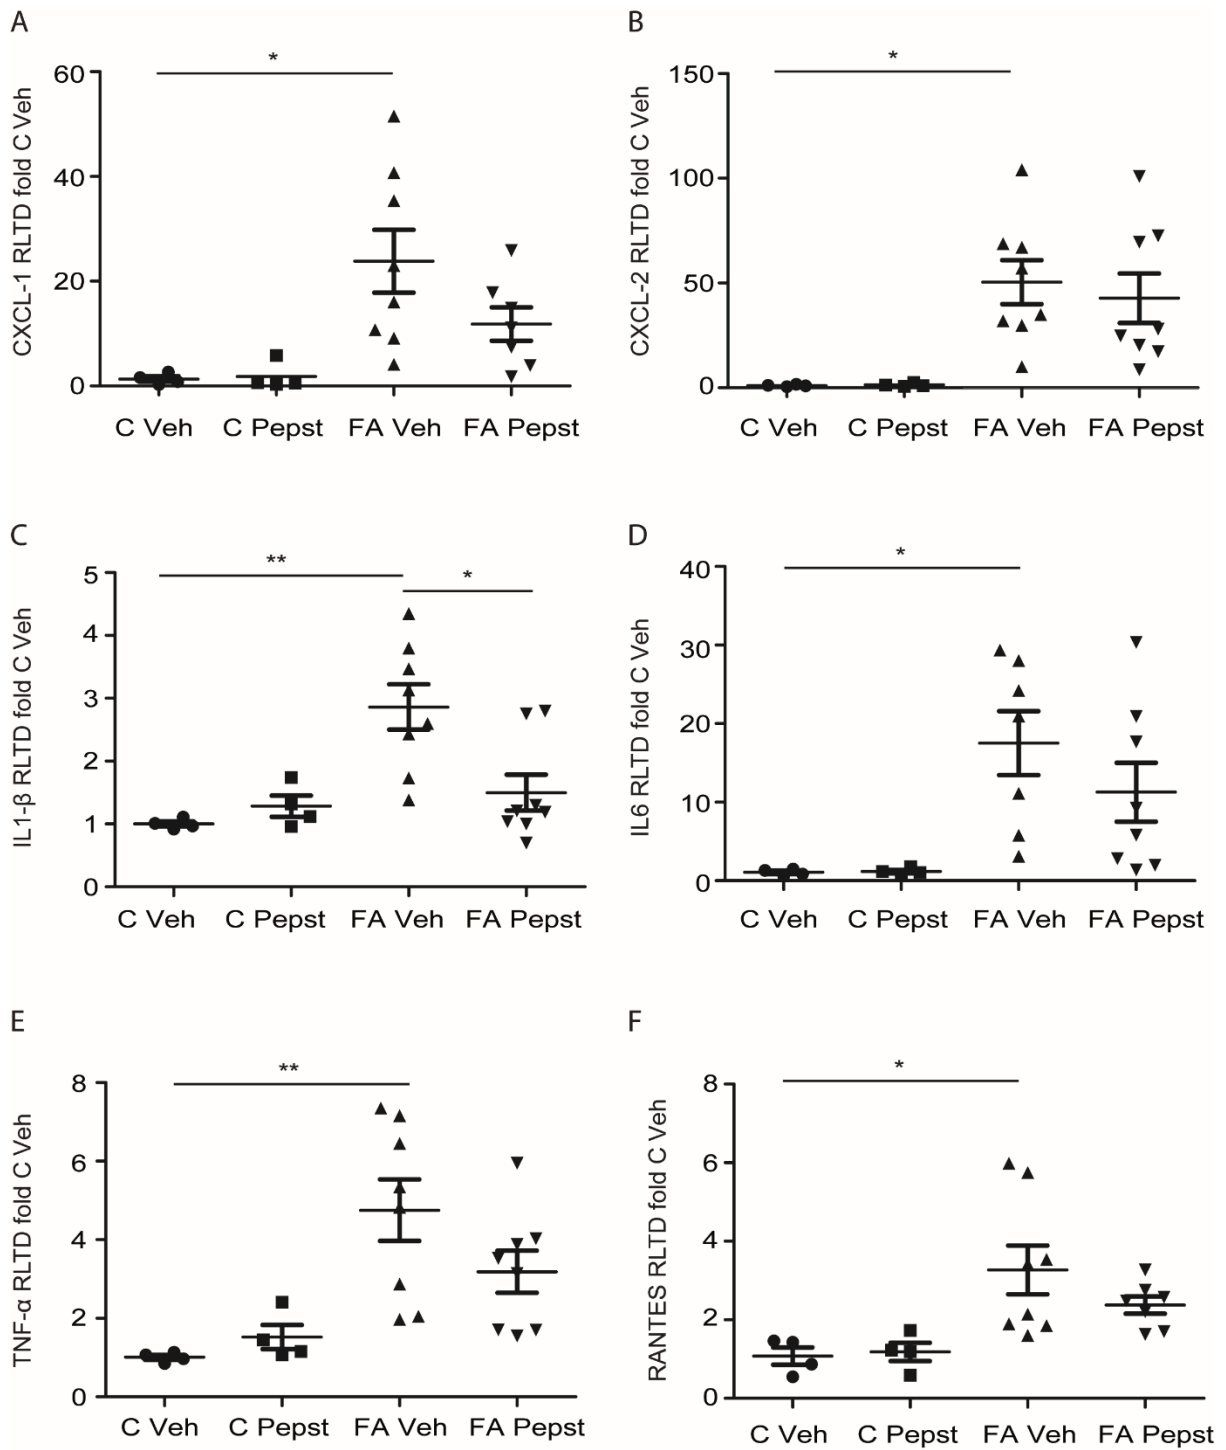

**Supplementary Figure S3: Differential expression of CtsD in proximal and distal tubular epithelial cells in sham and IRI injured kidneys**

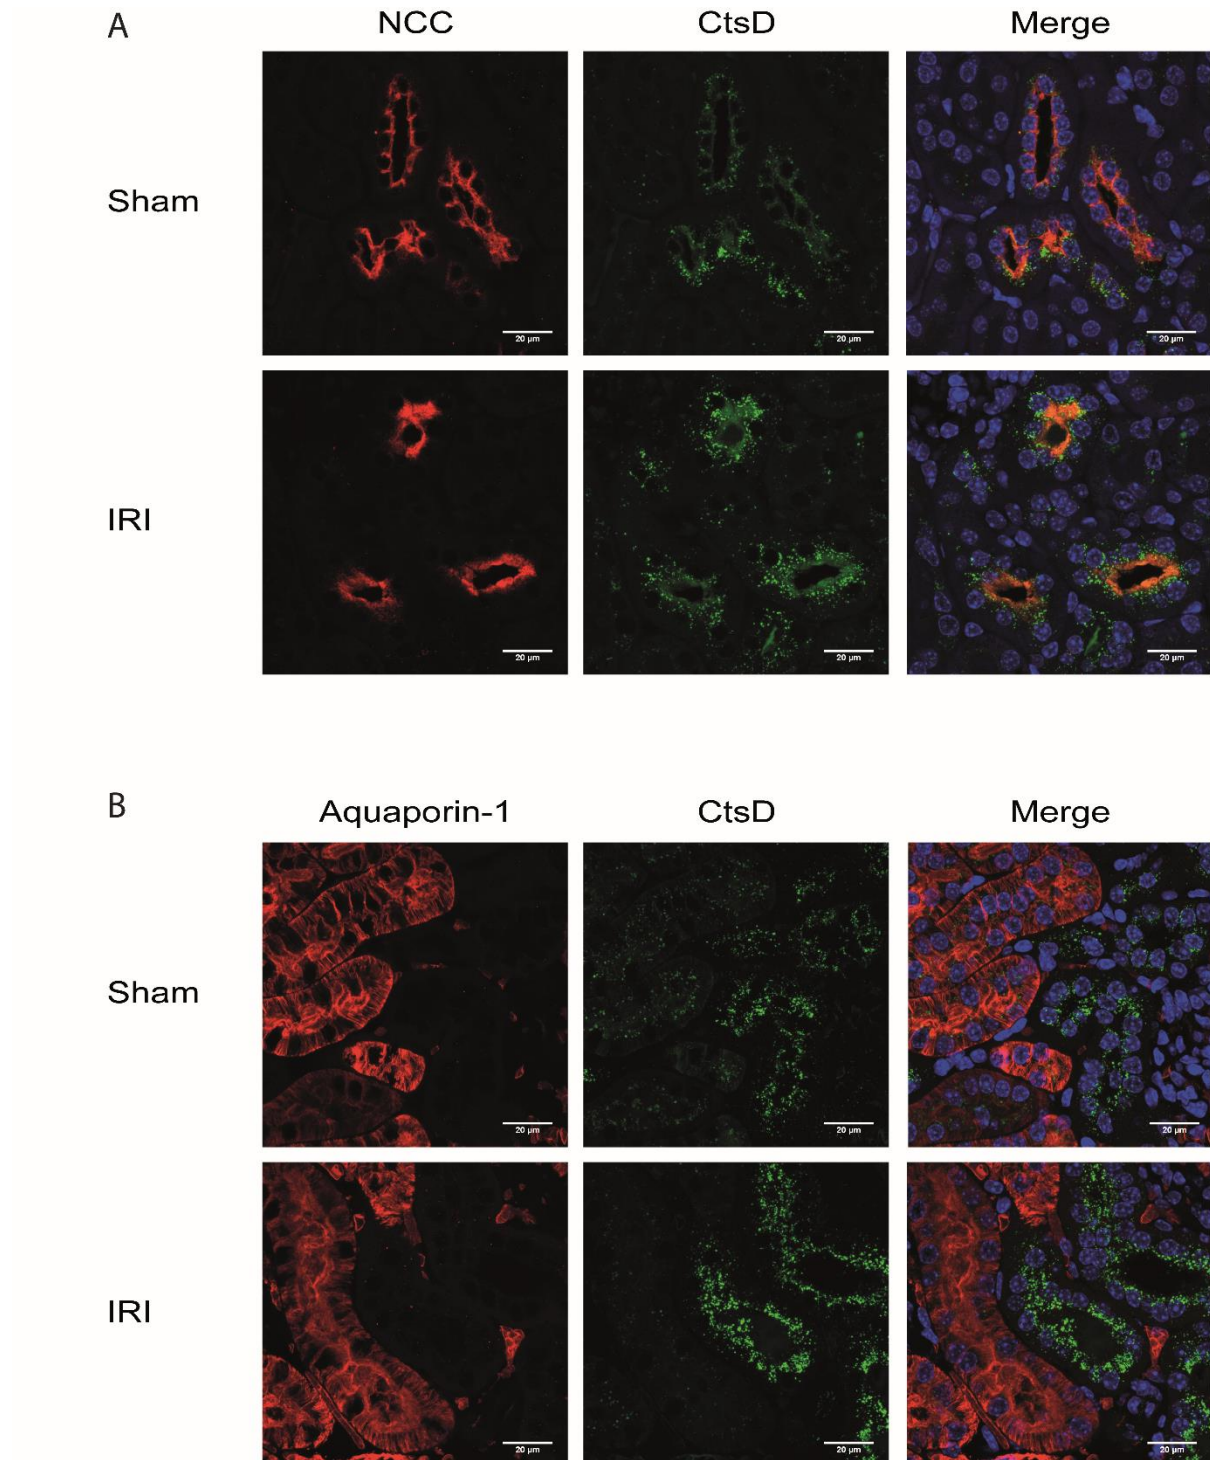

## Supplementary Figure S4: Pepstatin A does not affect inflammatory mediators

### during IRI induce AKI

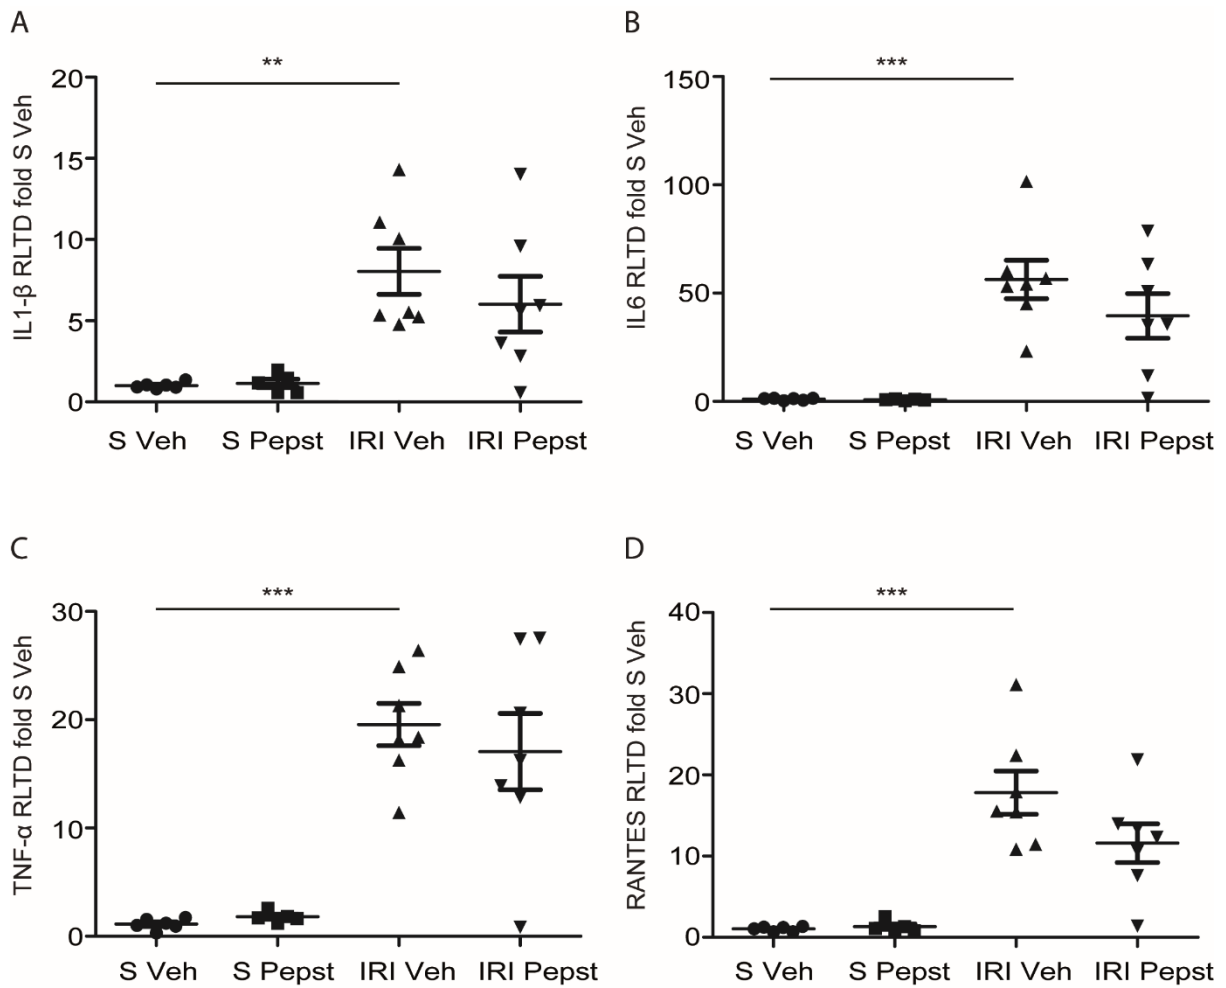

**Supplementary Figure S1: Differential expression of CtsD in proximal and distal tubular epithelial cells in vehicle and FA injured kidneys**

Representative confocal microscopy pictures of NCC (distal tubular cell)/CtsD **(A)** or Aquaporin-1 (proximal tubular cell)/CtsD **(B)** dual immunofluorescence in vehicle or FA injured kidneys for 48 hours. Pictures are displayed as NCC or Aquaporin-1 (red), CtsD (green) and merge with DAPI (blue) and represent the Z stack projection of the maximum intensity for each of the channels. Scale bar represents 20 $\mu$ m. N=8.

**Supplementary Figure S2: Pepstatin A does not affect inflammatory mediators during nephrotoxic induce AKI**

CXCL-1 **(A)**, CXCL-2 **(B)**, IL1- $\beta$  **(C)**, IL-6 **(D)**, TNF- $\alpha$  **(E)** and RANTES **(F)** mRNA expression from control and 48 hours FA vehicle or Pepstatin A treated kidneys. Animals were treated with vehicle or Pepstatin A (20mg/Kg) 45 minutes before and 24 hours post-FA. N=8, 1 way ANOVA, \*P  $\leq$  0.05 or \*\*P  $\leq$  0.01.

**Supplementary Figure S3: Differential expression of CtsD in proximal and distal tubular epithelial cells in sham and IRI injured kidneys**

Representative confocal microscopy pictures of NCC (distal tubular cell)/CtsD **(A)** or Aquaporin-1 (proximal tubular cell)/CtsD **(B)** dual immunofluorescence in sham or IRI injured kidneys (25 minutes ischemia, 24h reperfusion). Pictures are displayed as NCC or Aquaporin-1 (red), CtsD (green) and merge with DAPI (blue) and represent the Z stack projection of the maximum intensity for each of the channels. Scale bar represents 20 $\mu$ m. N=7.

**Supplementary Figure S4: Pepstatin A does not affect inflammatory mediators during IRI induce AKI**

IL1- $\beta$  (A), IL-6 (B), TNF- $\alpha$  (C) and RANTES (D) mRNA expression from sham and IRI vehicle or Pepstatin A treated kidneys. Ischemia was performed for 25 minutes and kidneys were reperfused for 24 hours. Animals were treated with vehicle or Pepstatin A 10mg/Kg 1 hour before surgery and 4 hours post-surgery. N=7, 1 way ANOVA,\*P  $\leq$  0.05 or \*\*P  $\leq$  0.01.

Supplementary table 1: Mouse primer sequences

| <b>Gene (GenBank Accession)</b> | <b>Primer sequence</b>              |
|---------------------------------|-------------------------------------|
| Col1A1 (NM_007742)              | Fw: 5'-TTCACCTACAGCACGCTTGTG-3'     |
|                                 | Rv: 5'-GATGACTGTCTTGCCCCAAGTT-3'    |
| Col 3A1 (NM_009930)             | Fw: 5'-CTGTAACATGGAAACTGGGGAAA-3'   |
|                                 | Rv: 5'-CCATAGCTGAACTGAAAACCACC-3'   |
| CXCL-1 (NM_008176)              | Fw: 5'- CTGGGATTCACCTCAAGAACATC-3'  |
|                                 | Rv: 5'- CAGGGTCAAGGCAAGCCTC-3'      |
| CXCL-2 (NM_009140)              | Fw: 5'- CCAACCACCAGGCTACAGG-3'      |
|                                 | Rv: 5'- GCGTCACACTCAAGCTCTG-3'      |
| IL-1 $\beta$ (NM_008361)        | Fw: 5'-CAACCAACAAGTGATATTCTCCATG-3' |
|                                 | Rv: 5'-GATCCACACTCTCCAGCTGCA-3'     |
| IL-6 (NM_031168)                | Fw: 5'- TAGTCCTTCCTACCCCAATTTCC-3'  |
|                                 | Rv: 5'- TTGGTCCTTAGCCACTCCTTC-3'    |
| RANTES (NM_013653)              | Fw: 5'-TGCTGCTTTGCCTACCTCTCC-3'     |
|                                 | Rv: 5'- TGGCACACACTTGGCGGTTCC-3'    |
| TNF- $\alpha$ (NM_013693)       | Fw: 5'-CCCTCACACTCAGATCATCTTCT-3'   |
|                                 | Rv: 5'- GCTACGACGTGGGCTACAG-3'      |
